# Supplementary material for: Composition, size and cloud condensation nuclei activity of biomass burning aerosol from north Australian savannah fires
Source: Copernicus journal article supplement (doi:10.5194/acp-2016-867), 2016-10-07
Supplement: Supplementary file 1 [file acp-2016-867-supplement.pdf]

1 **Supplementary**

2 Supplementary Figure S1 shows the average PToF size distribution for each species  
3 measured by the cToF-AMS. While the mode of organics (right axis) and nitrates was  
4 at an aerodynamic diameter of ~250 nm, the mode of ammonium and sulphate species  
5 was higher at 350 nm. Because of this, the size-resolved composition between 100 nm  
6 and 200 nm was used, as this is most relevant for CCN activation.

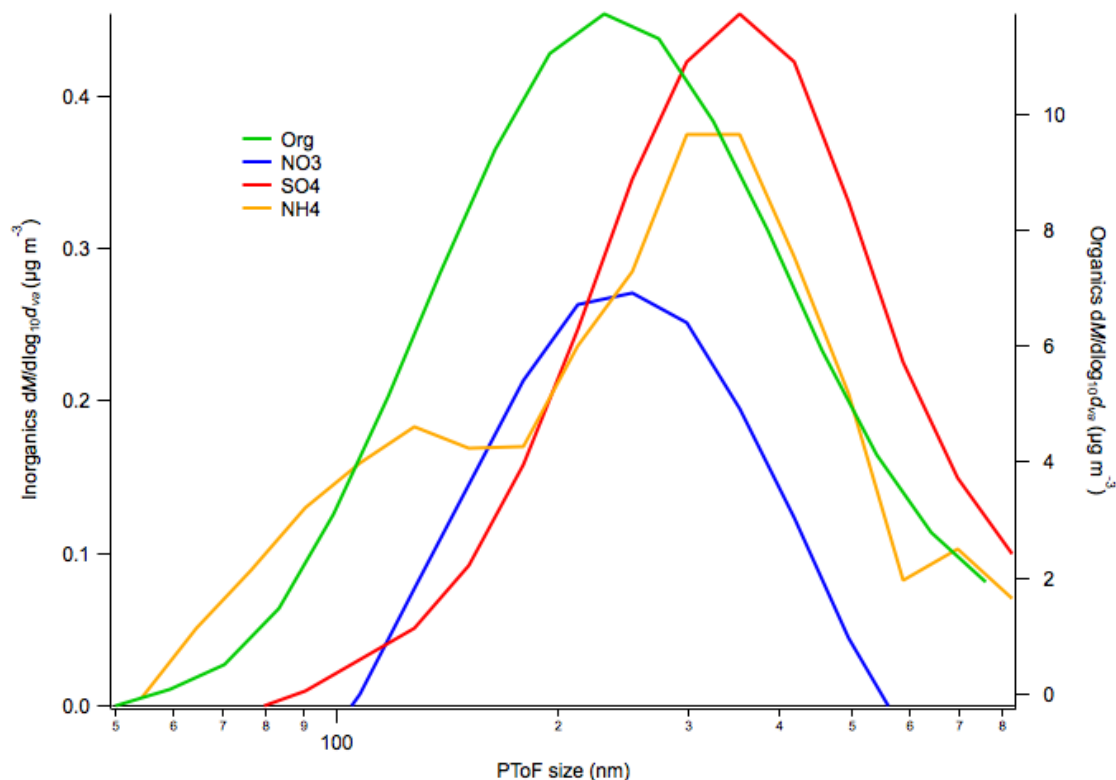

7

8 *Supplementary Figure S1 The average size-resolved chemical composition for the entire sampling period.*

9 Figure S2 shows the sensitivity of temperature and the contribution of surface tension  
10 effects on the calculated hygroscopicity parameter,  $\kappa$ . The temperature in the CCN  
11 counter during the sampling period was  $308\text{K} \pm 3\text{K}$ . The surface tension of  $0.072\text{ Jm}^{-2}$   
12 is that of pure water while  $0.0683\text{ Jm}^{-2}$  and  $0.052\text{ Jm}^{-2}$  are the surface tensions observed  
13 in BBA from a woody fuel (Asa-Awuku et al., 2008) and a suggested lower estimate  
14 for carbon-containing aerosol (Mircea et al., 2005), respectively. The temperature  
15 variations of  $\pm 3\text{K}$  had a negligible impact on the calculated  $\kappa$ . Taking the slightly  
16 smaller surface tension of  $0.0683\text{ Jm}^{-2}$  resulted in only a minor reduction in the  
17 hygroscopicity parameter, suggesting that it is the solubility of the BBA components  
18 primarily responsible for water uptake rather than reductions in surface tension. This  
19 value of surface tension, although observed previously for BBA, is not necessarily

1 applicable for the BBA observed in this campaign as different fuel loads and burn  
 2 conditions lead to different BBA composition. Mircea et al., (2005) found that the  
 3 surface tension is a function of dissolved organic carbon concentration with values  
 4 ranging from  $0.072 \text{ Jm}^{-2}$  for low dissolved organic carbon concentrations to  $0.052 \text{ Jm}^{-2}$   
 5  $^2$  for dissolved organic carbon concentrations at and above  $0.1 \text{ moles l}^{-1}$ . Taking this  
 6 lower estimate value of surface tension resulted in a large reduction in the calculated  $\kappa$ .

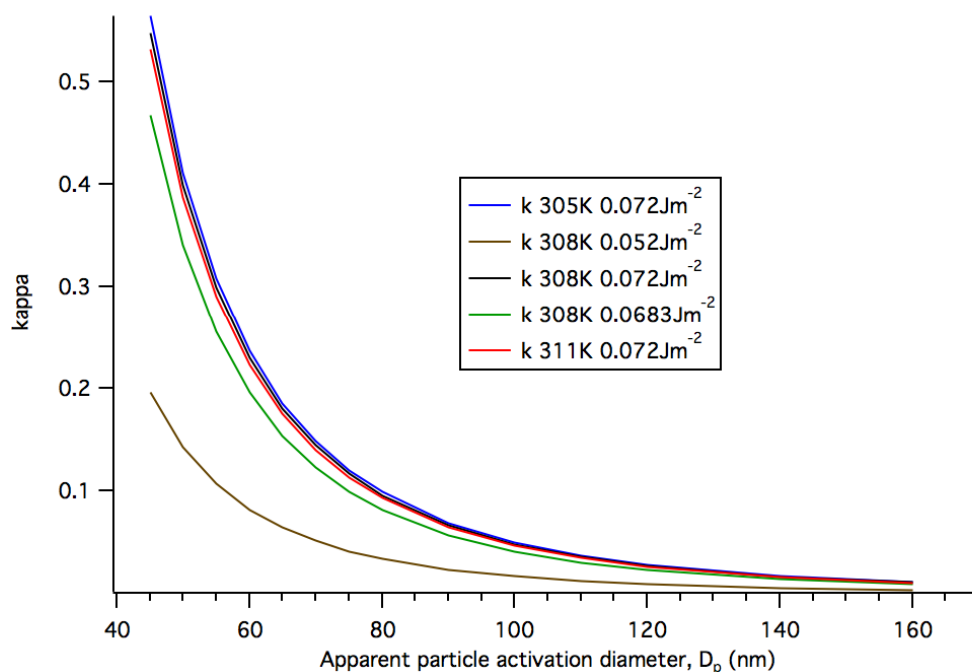

7  
 8  
 9  
 10  
 11  
 12

Supplementary Figure S2 The hygroscopicity parameter,  $\kappa$ , as a function of the critical diameter,  $D_p$ , for different temperatures and surface tensions. Temperatures of 305K and 311K were investigated as 308K was the average temperature within the CCN counter with a standard deviation of 3K.  $0.072 \text{ Jm}^{-2}$  is the surface tension of pure water, while  $0.0683 \text{ Jm}^{-2}$  and  $0.052 \text{ Jm}^{-2}$  are the surface tension of previously observed BBA (Asa-Awuku et al., 2008) and a suggested theoretical minimum surface tension (Mircea et al., 2005), respectively.

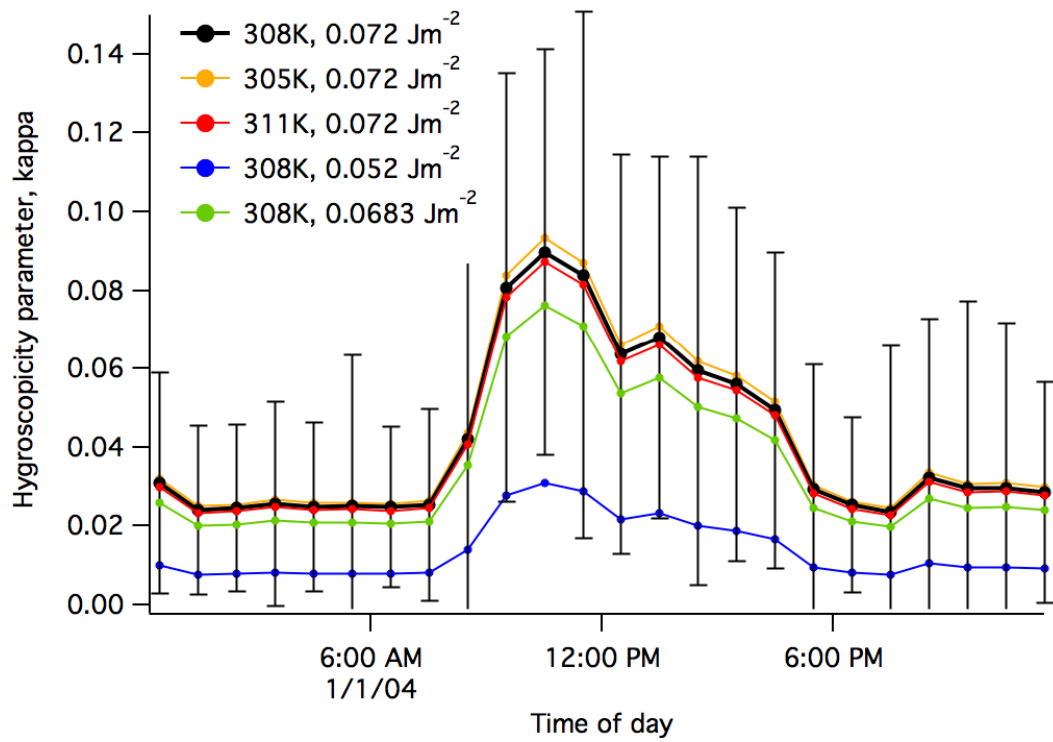

1

2 *Supplementary Figure S3 The diurnal trends of the hygroscopicity parameter,  $\kappa$ , when assuming different*  
 3 *temperatures and surface tensions, as discussed in Figure S3.*
